# Supplementary material for: MRI-Based T2 and Arterial Radiomics to Differentiate Focal Nodular Hyperplasia (FNH) from Hepatocellular Adenoma (HCA): A High-Accuracy Spleen-Referenced Approach
Source: Research Square preprint supplement (doi:10.21203/rs.3.rs-6631565/v1), 2025-06-09
Supplement: Supplementary file 1 [file 066beae6618dfba52d22d173.docx]

**Supplementary Appendix A.**

**“MRI-Based T2 and Arterial Radiomics to Differentiate Focal Nodular Hyperplasia (FNH) from Hepatocellular Adenoma (HCA): A High-Accuracy Spleen-Referenced Approach”**

- ***Running title:* *Spleen-Referenced MRI Radiomics for FNH vs. HCA***

**Aminreza Abkhoo; Iman Foroughmand; Sara Ganjizadeh; Afshar Ghamari khameneh; Amirhossein kamalian; Niloufar Ayoubi; Farid Azmoudeh-Ardalan; Nasir Fakhar; Faezeh Salahshoor***

**Corresponding author:**

* Faeze Salahshour

o Email: faeze.salahshoor@gmail.com

o Department of Radiology, School of Medicine, Advanced Diagnostic and

Interventional Radiology Research Center (ADIR), Imam Khomeini Hospital,

Tehran University of Medical Sciences, Tehran, Iran.

**Comprehensive Radiomic Feature Catalogue (n = 108)**
*Features are grouped by radiomic category in the order employed for model construction. Abbreviations: GLCM = Gray‑Level Co‑occurrence Matrix; GLRLM = Gray‑Level Run‑Length Matrix; GLSZM = Gray‑Level Size‑Zone Matrix; SI = signal intensity; SID = signal‑intensity difference; SIR = signal‑intensity ratio; ADC = apparent diffusion coefficient; DWI = diffusion‑weighted imaging.*

### I. Morphological Features (22)

| **No.** | **Feature** | **Definition** |
| --- | --- | --- |
| M‑01 | Maximum Diameter | Long‑axis lesion length (mm) on axial reference sequence |
| M‑02 | Volume | Voxel‑based lesion volume (cm³) |
| M‑03 | Surface Area | Triangulated surface area (cm²) |
| M‑04 | Sphericity | π1/3(6V)2/3Surface Area\frac{\pi^{1/3}(6V)^{2/3}}{\text{Surface Area}}; value = 1 for a perfect sphere |
| M‑05 | Compactness | V(Surface Area)3/2\frac{V}{(\text{Surface Area})^{3/2}} |
| M‑06 | Solidity | Ratio of lesion volume to its convex hull volume |
| M‑07 | Elongation | Major‑to‑minor axis ratio of best‑fit ellipsoid |
| M‑08 | Flatness | Third‑to‑second principal component ratio |
| M‑09 | Eccentricity | Distance between foci / major axis length |
| M‑10 | Lobulation Index | Count of external concave edges (>3 mm depth) |
| M‑11 | Capsule Presence | Binary indicator of macroscopic capsule on contrast‑enhanced imaging |
| M‑12 | Capsule Completeness | Percentage circumferential coverage of capsule |
| M‑13 | Central Scar Visibility | Presence of scar tissue on any sequence |
| M‑14 | Atoll Sign | Peripheral T2‑hyperintense rim surrounding central isointensity |
| M‑15 | Margin Sharpness | Mean radial SI gradient at lesion‑liver interface |
| M‑16 | Intralesional Fat | Chemical‑shift signal drop ≥ 20 % |
| M‑17 | Intralesional Iron | T2* signal loss ≥ 15 % |
| M‑18 | Cystic/Hemorrhagic Component | Qualitative identification on T2/T1 |
| M‑19 | Segmental Location | Couinaud segment of epicentre (I‑VIII) |
| M‑20 | Hepatic‑Vein Distance | Shortest 3‑D distance to nearest major hepatic vein (mm) |
| M‑21 | Radial Growth Angle | Mean angle between capsule normal vectors and liver surface |
| M‑22 | Perilesional Edema | Hyperintense halo on fat‑suppressed T2 |

### II. First‑Order Intensity Features (41)

| **No.** | **Feature** | **Definition** |
| --- | --- | --- |
| F‑01 | Mean SI T2 | Mean lesion SI on T2‑weighted image |
| F‑02 | SD SI T2 | Standard deviation of T2 SI |
| F‑03 | Skewness T2 | Third standardized moment of T2 SI |
| F‑04 | Kurtosis T2 | Fourth standardized moment of T2 SI |
| F‑05 | Entropy T2 | −∑pilog⁡2pi-\sum p_i \log_2 p_i for T2 histogram |
| F‑06 | Mean SI T1‑In | Mean lesion SI on T1 in‑phase |
| F‑07 | Mean SI T1‑Opp | Mean lesion SI on T1 opposed‑phase |
| F‑08 | DIXON Signal‑Loss % | (In−Opp)/In×100(\text{In} - \text{Opp})/\text{In}\times100 |
| F‑09 | Mean SI T1‑FS | Lesion SI on fat‑suppressed T1 |
| F‑10 | Mean SI FIESTA | Mean SI on steady‑state sequence |
| F‑11 | Arterial Mean SI | Quantitative lesion SI in arterial phase |
| F‑12 | Portal Mean SI | Quantitative lesion SI in portal phase |
| F‑13 | Delayed Mean SI | Quantitative lesion SI in delayed phase |
| F‑14 | Arterial SID | Lesion‑liver SI difference (arterial) |
| F‑15 | Portal SID | Lesion‑liver SI difference (portal) |
| F‑16 | Delayed SID | Lesion‑liver SI difference (delayed) |
| F‑17 | T2 SIR | Lesion‑liver SI ratio (T2) |
| F‑18 | FIESTA SIR | Lesion‑liver SI ratio (FIESTA) |
| F‑19 | Arterial SIR | Lesion‑liver SI ratio (arterial) |
| F‑20 | Portal SIR | Lesion‑liver SI ratio (portal) |
| F‑21 | Delayed SIR | Lesion‑liver SI ratio (delayed) |
| F‑22 | ADC Mean | Mean lesion ADC (×10⁻³ mm²/s) |
| F‑23 | ADC Min | Minimum lesion ADC |
| F‑24 | ADC Max | Maximum lesion ADC |
| F‑25 | ADC SD | Standard deviation of lesion ADC |
| F‑26 | DWI b50 Mean | Lesion SI at b = 50 s mm⁻² |
| F‑27 | DWI b400 Mean | Lesion SI at b = 400 s mm⁻² |
| F‑28 | DWI b800 Mean | Lesion SI at b = 800 s mm⁻² |
| F‑29 | DWI b50 SIR | Lesion‑liver ratio at b = 50 |
| F‑30 | DWI b400 SIR | Lesion‑liver ratio at b = 400 |
| F‑31 | DWI b800 SIR | Lesion‑liver ratio at b = 800 |
| F‑32 | Central‑Scar SI T2 | Mean SI of scar ROI on T2 |
| F‑33 | Central‑Scar SI T1 | Mean SI of scar ROI on pre‑contrast T1 |
| F‑34 | Central‑Scar Enhancement Δ | Scar SI change (arterial – T2) |
| F‑35 | Rim Hypointensity Score | Binary indicator of hypointense arterial rim |
| F‑36 | Margin‑Contrast Ratio | Lesion rim SI / core SI (T2) |
| F‑37 | Heterogeneity Index | SDMean\frac{\text{SD}}{\text{Mean}} of T2 SI |
| F‑38 | Relative Enhancement Ar‑Po | (Arterial SI – Portal SI)/Portal SI |
| F‑39 | Relative Enhancement Po‑De | (Portal SI – Delayed SI)/Delayed SI |
| F‑40 | Out‑of‑Phase Drop Index | (In‑phase SI – Opp‑phase SI)/In‑phase SI |
| F‑41 | Wash‑out Gradient | Slope of SI from arterial to delayed phase |

### III. Textural Features (GLCM, GLRLM, GLSZM) (27)

| **No.** | **Feature** | **Sequence** | **Matrix Type** |
| --- | --- | --- | --- |
| T‑01 | GLCM Contrast | T2 | GLCM |
| T‑02 | GLCM Correlation | T2 | GLCM |
| T‑03 | GLCM Homogeneity | T2 | GLCM |
| T‑04 | GLCM Energy | T2 | GLCM |
| T‑05 | GLCM Entropy | T2 | GLCM |
| T‑06 | GLCM Dissimilarity | ADC | GLCM |
| T‑07 | GLCM Sum‑Average | ADC | GLCM |
| T‑08 | GLCM Sum‑Variance | ADC | GLCM |
| T‑09 | GLCM Inverse Diff Moment | FIESTA | GLCM |
| T‑10 | GLRLM Short‑Run Emphasis | T2 | GLRLM |
| T‑11 | GLRLM Long‑Run Emphasis | T2 | GLRLM |
| T‑12 | GLRLM Run‑Length Non‑Uniformity | T2 | GLRLM |
| T‑13 | GLRLM Grey‑Level Non‑Uniformity | T2 | GLRLM |
| T‑14 | GLRLM Run‑Percentage | FIESTA | GLRLM |
| T‑15 | GLRLM High‑Grey‑Run Emphasis | FIESTA | GLRLM |
| T‑16 | GLRLM Low‑Grey‑Run Emphasis | FIESTA | GLRLM |
| T‑17 | GLSZM Zone‑Size Variance | T2 | GLSZM |
| T‑18 | GLSZM Zone‑Size Non‑Uniformity | T2 | GLSZM |
| T‑19 | GLSZM Large‑Zone Emphasis | T2 | GLSZM |
| T‑20 | GLSZM Grey‑Level Variance | ADC | GLSZM |
| T‑21 | GLSZM Zone‑Entropy | ADC | GLSZM |
| T‑22 | GLSZM Cluster‑Shade | ADC | GLSZM |
| T‑23 | GLSZM Cluster‑Prominence | ADC | GLSZM |
| T‑24 | GLCM Autocorrelation | Portal phase | GLCM |
| T‑25 | GLCM Maximum Probability | Portal phase | GLCM |
| T‑26 | GLRLM Run‑Entropy | Portal phase | GLRLM |
| T‑27 | GLSZM Small‑Zone Emphasis | Delayed phase | GLSZM |

### IV. Spleen‑Referenced Features (10)

| **No.** | **Feature** | **Definition** |
| --- | --- | --- |
| S‑01 | T2 SIR (Lesion‑to‑Spleen) |  |
| S‑02 | FIESTA SIR (Lesion‑to‑Spleen) |  |
| S‑03 | Arterial SIR (Lesion‑to‑Spleen) |  |
| S‑04 | Portal SIR (Lesion‑to‑Spleen) |  |
| S‑05 | Delayed SIR (Lesion‑to‑Spleen) |  |
| S‑06 | ADC Ratio (Lesion/Spleen) |  |
| S‑07 | DWI b50 SIR (Lesion‑to‑Spleen) |  |
| S‑08 | DWI b400 SIR (Lesion‑to‑Spleen) |  |
| S‑09 | DWI b800 SIR (Lesion‑to‑Spleen) |  |
| S‑10 | Normalised Spleen‑SD Corrected SIR | SIR divided by spleen SI SD |

### V. Diffusion‑Delta Metrics (8)

| **No.** | **Feature** | **Definition** |
| --- | --- | --- |
| D‑01 | ΔDWI (b800 – b50) SI | Lesion SI difference between b = 800 and b = 50 |
| D‑02 | ΔDWI (b400 – b50) SI | Lesion SI difference between b = 400 and b = 50 |
| D‑03 | ΔDWI (b800 – b400) SI | Lesion SI difference between b = 800 and b = 400 |
| D‑04 | ΔADC (Lesion – Liver) | ADC difference lesion vs liver |
| D‑05 | ΔADC Mean‑Min | Lesion ADCmean – ADCmin |
| D‑06 | Relative ADC Drop | (ADCmean – ADCmin)/ADCmean |
| D‑07 | Intra‑Lesion b‑Slope | Linear regression slope of SI across b‑values |
| D‑08 | ΔDWI SIR (b50→b800) | Change in lesion‑to‑liver SIR from b = 50 to b = 800 |
